# Supplementary material for: BICD2, dynactin, and LIS1 cooperate in regulating dynein recruitment to cellular structures
Source: PubMed Central journal article supplement — Mol Biol Cell. 2012 Nov 1;23(21):4226–41. doi: 10.1091/mbc.E12-03-0210 (PMC3484101; doi:10.1091/mbc.e12-03-0210), 2012-11-01
Supplement: supp_E12-03-0210v1_SplinterSupplemetalMaterials.pdf [file supp_E12-03-0210v1_SplinterSupplemetalMaterials.pdf]

## Supplemental Materials.

### Supplemental Figures and Tables

**Supplemental Table S1. Identification of BICD2-N binding subunits of dynein and dynactin by mass spectrometry.** All proteins identified with a significant score and not present in the background controls are listed.

#### A. Mass spectrometry analysis of purified bovine dynactin

| Score | NCBI GI number | Description                             | Da     | Coverage (%) | Unique Peptides |
|-------|----------------|-----------------------------------------|--------|--------------|-----------------|
| 3890  | gi 149642611   | dynactin 1 (p150Glued)                  | 137458 | 45.2         | 41              |
| 1478  | gi 5031569     | ARP1                                    | 42701  | 54.5         | 16              |
| 1185  | gi 77736063    | dynactin 2 (p50)                        | 44495  | 35.7         | 14              |
| 1177  | gi 119914141   | cytoplasmic dynein heavy chain          | 548197 | 5.8          | 19              |
| 933   | gi 28603770    | capping protein beta                    | 34176  | 27.6         | 12              |
| 822   | gi 61316470    | capping protein alpha 2                 | 33073  | 55.6         | 9               |
| 712   | gi 73953656    | dynactin p62                            | 54023  | 29.3         | 9               |
| 262   | gi 115497348   | cytoplasmic dynein intermediate chain 2 | 68734  | 9.5          | 3               |
| 178   | gi 119892302   | kinesin family member 21A               | 187179 | 1.5          | 2               |
| 151   | gi 115497064   | dynactin 3 (p22)                        | 21292  | 15.1         | 3               |
| 130   | gi 115497256   | dynactin 6 (p27)                        | 21061  | 14.2         | 2               |
| 68    | gi 164420721   | dynactin 5 (p24)                        | 20698  | 8.2          | 2               |
| 63    | gi 76640631    | dynein light intermediate chain 2       | 54392  | 2.4          | 1               |

#### B. Mass spectrometry analysis of purified bovine dynein

| Score | NCBI GI number | Description                                     | Da     | Coverage (%) | Unique Peptides |
|-------|----------------|-------------------------------------------------|--------|--------------|-----------------|
| 16600 | gi 119914141   | cytoplasmic dynein heavy chain                  | 548197 | 50.5         | 199             |
| 1593  | gi 114051407   | cytoplasmic dynein light intermediate chain 1   | 56800  | 49.6         | 22              |
| 956   | gi 76640631    | cytoplasmic dynein light intermediate chain 2   | 54392  | 32.3         | 14              |
| 840   | gi 11276091    | cytoplasmic dynein intermediate chain 1         | 73222  | 22.7         | 10              |
| 732   | gi 74004544    | cytoplasmic dynein intermediate chain 2         | 69215  | 27.7         | 9               |
| 321   | gi 18777767    | cytoplasmic dynein light chain roadblock type 1 | 10983  | 74.0         | 4               |
| 108   | gi 5730085     | cytoplasmic dynein, light chain Tctex           | 12672  | 14.2         | 1               |
| 75    | gi 157074188   | ARP1                                            | 42382  | 2.7          | 1               |
| 47    | gi 77736063    | dynactin 2 (p50)                                | 44495  | 2.2          | 1               |

#### C. Mass spectrometry analysis of Bio-GFP-BICD2-N-dynein-dynactin complex after cross-linking with low doses of Bis[sulfosuccinimidyl] glutarate and isolated by pull-down with streptavidin beads in denaturing conditions

| Score | NCBI GI number | Description                                   | Da     | Coverage (%) | Unique Peptides |
|-------|----------------|-----------------------------------------------|--------|--------------|-----------------|
| 8026  | gi 119914141   | Cytoplasmic dynein heavy chain                | 548197 | 29.3         | 124             |
| 718   | gi 149642611   | Dynactin 1 (p150Glued)                        | 137458 | 8.4          | 9               |
| 513   | gi 18139547    | BICD2                                         | 93562  | 8.9          | 7               |
| 366   | gi 114051407   | Cytoplasmic dynein light intermediate chain 1 | 56800  | 12.6         | 7               |
| 365   | gi 76640631    | Cytoplasmic dynein light intermediate chain 2 | 54392  | 15.2         | 6               |

# Splinter et al., Suppl. Figure S1

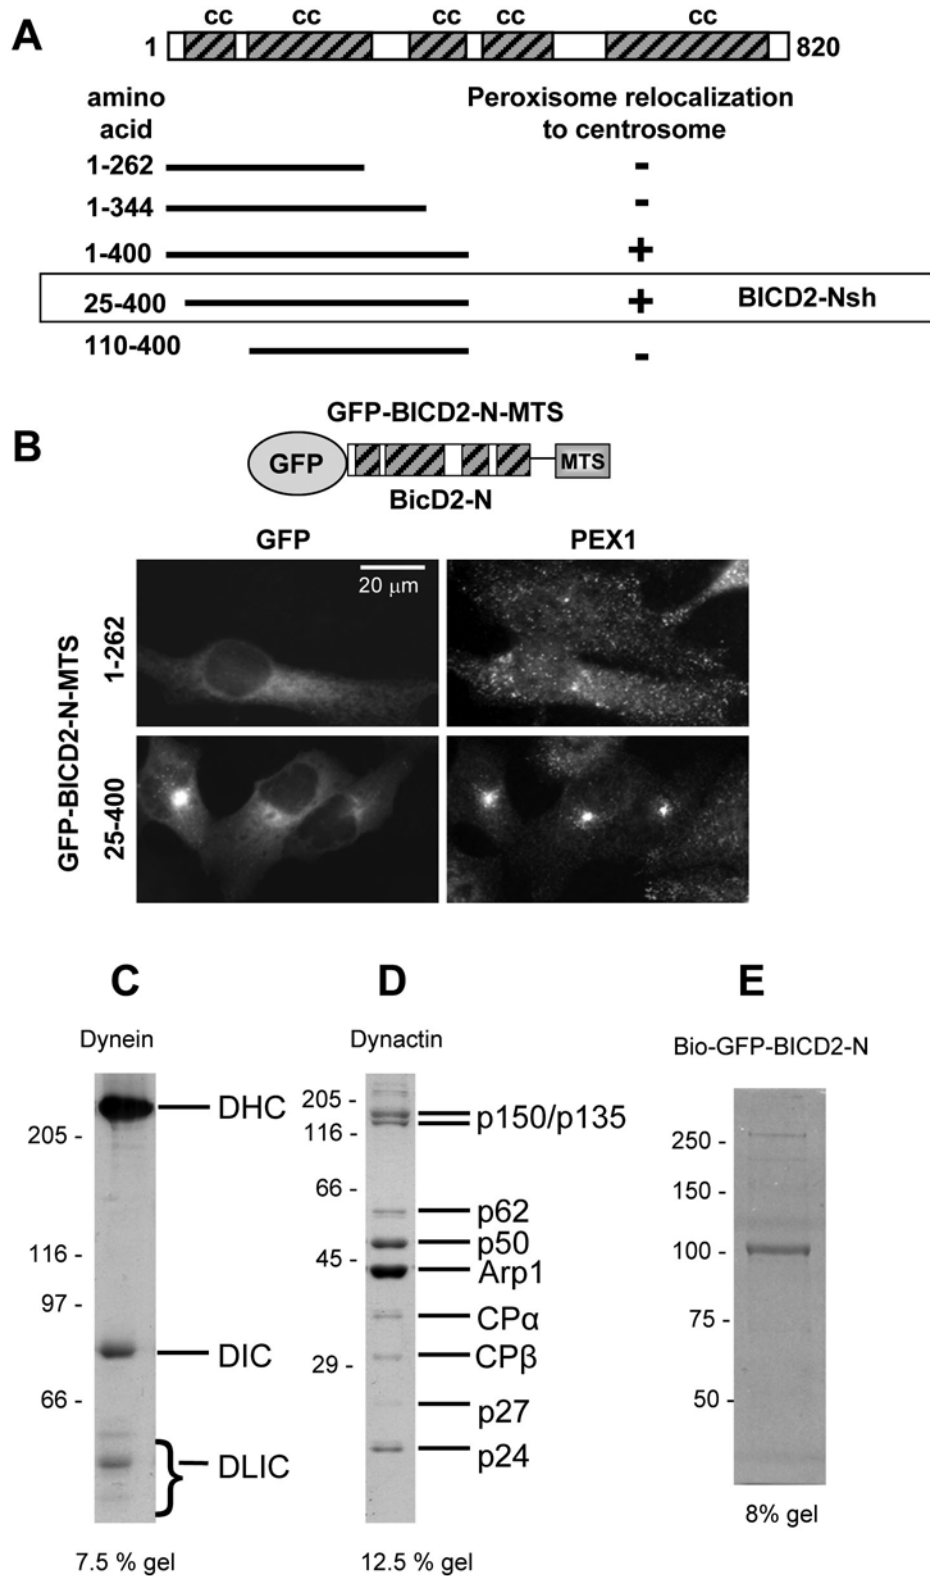

**Supplemental Figure S1. Mapping of the minimal dynein-interacting domain of BICD2 and characterization of the purified protein complexes.**

**(A,B)** Mapping of the minimal dynein-interacting domain of BICD2 using peroxisome/mitochondria relocation assay. In this assay, BICD2-N fragments are targeted to the cytosolic side of the peroxisomes and mitochondria using the *Listeria monocytogenes* ActA-derived membrane-targeting sequence (MTS) and the distribution of the organelles is assessed by immunofluorescent staining (Hoogenraad *et al.*, 2003). When dynein motors are recruited to the organelles, these organelles form a tight pericentrosomal cluster. **(A)** A scheme of BICD2 fragments used and a summary of their effect on peroxisome localization when fused to MTS. The shortest construct, which potently relocated is indicated by a box. **(B)** A scheme of GFP-BICD2-N-MTS constructs and representative images showing HeLa cells transfected with different BICD2-N-MTS fusions and stained for the peroxisome marker PEX1. Peroxisomes are relocated to the pericentrosomal region by the GFP-BICD2-N-MTs fusion containing amino acids 25-400 of BICD2, but not by the fusion containing amino acids 1-262.

**(C,D)** Coomassie-stained gels of dynein (7.5% acrylamide) **(C)** and dynactin (12.5% acrylamide) **(D)** complexes are shown with individual subunits identified.

**(E)** Coomassie-stained gel showing BICD2-N purified from HEK293 cells.

# Splinter et al., Suppl. Figure S2

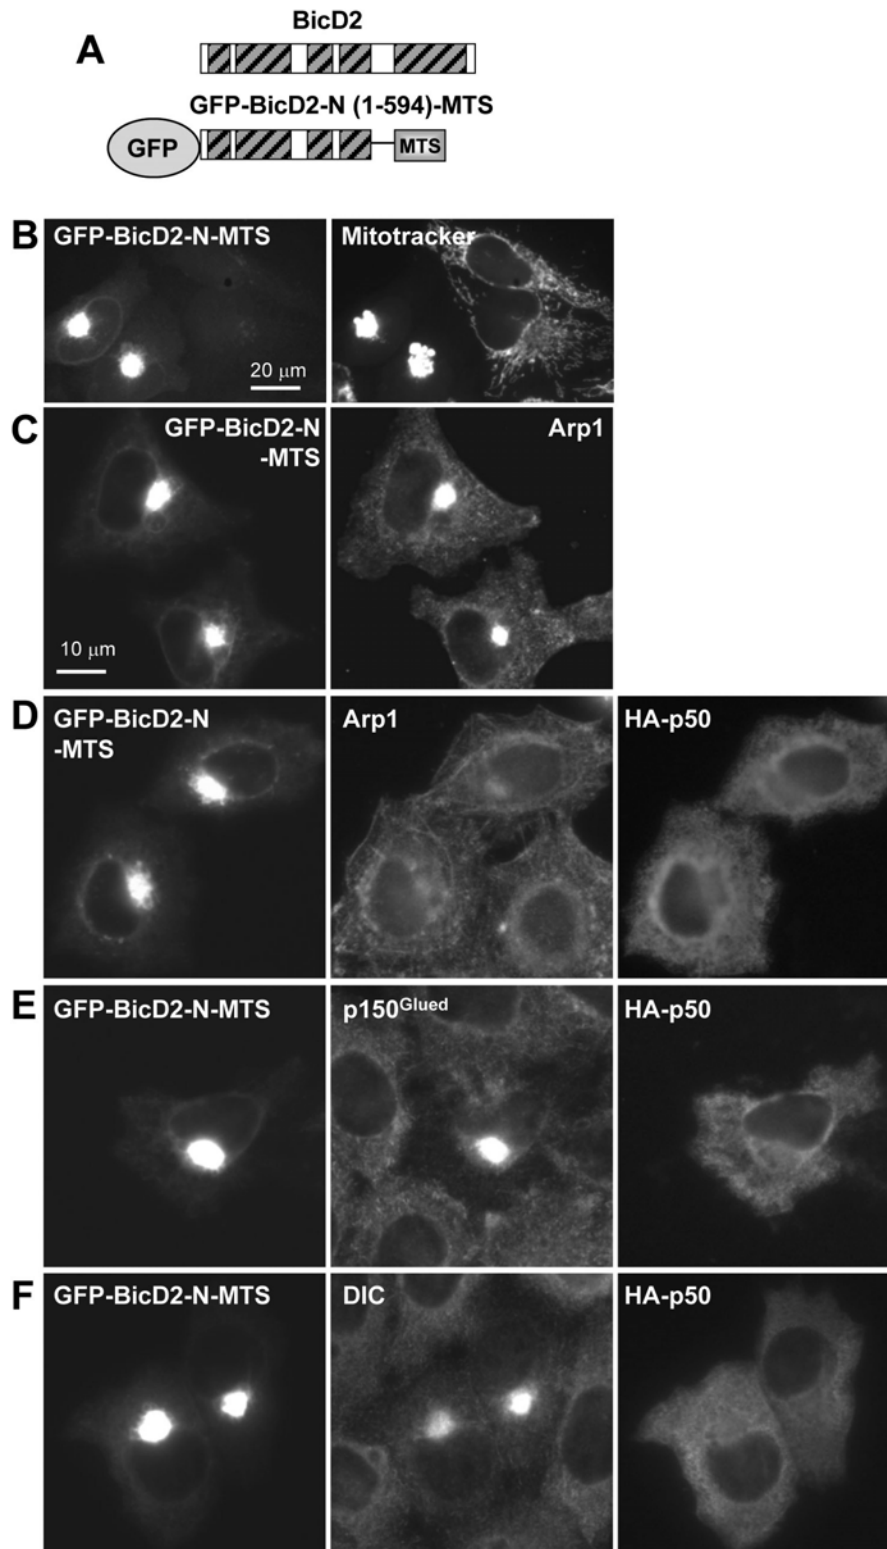

**Supplemental Figure S2. Overexpression of p50/dynaminin removes Arp1 but not dynein or p150Glued from the mitochondrial cluster induced by BICD2-N expression.**

**(A)** A scheme of GFP-BICD2-N-MTS construct.

**(B-F)** HeLa cells were transfected either with GFP-BICD2-N-MTS alone **(B,C)** or together with HA-p50/dynaminin **(D-F)**, fixed with cold methanol (for dynein staining), with cold methanol followed by 4% paraformaldehyde (for dynactin subunits) or with 4% paraformaldehyde in culturing medium (to visualize mitochondria). Cells were stained with the indicated antibodies against dynein or dynactin subunits, HA tag, or MitoTracker Red CMXRos.

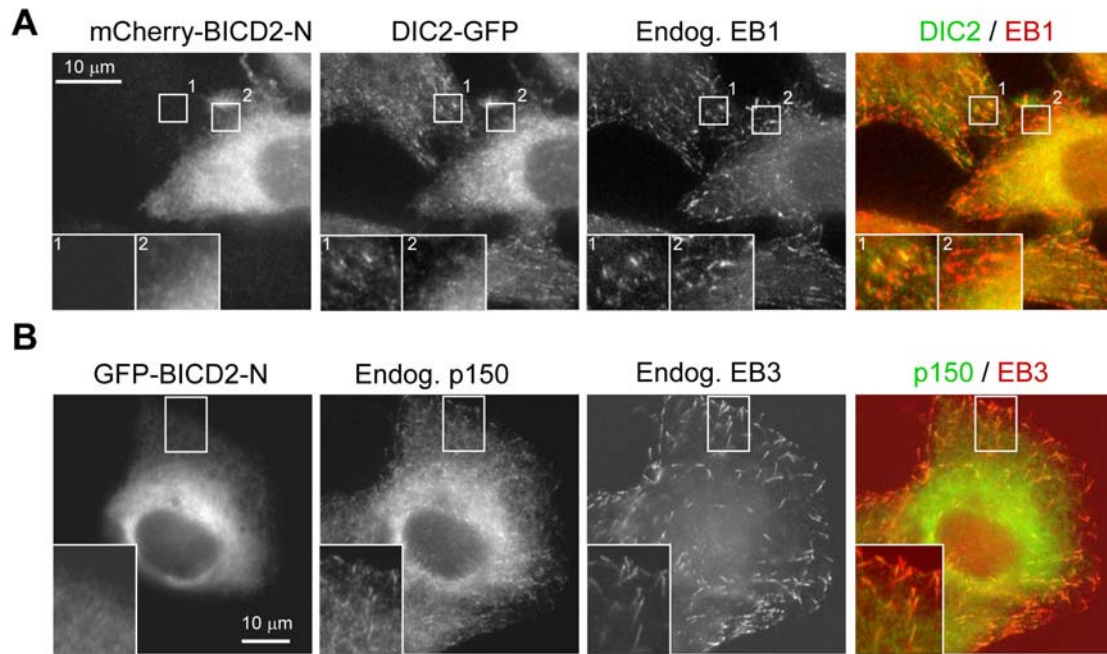

**Supplemental Figure S3. BICD2-N displaces dynein but not dynactin from MT tips.**

(A) HeLa cells stably expressing DIC2-GFP (green) were transfected with mCherry-BICD2-N and stained for endogenous EB1, a marker of growing MT plus ends (red). Insets show enlargements of the boxed areas indicated by numbers. Note that DIC2-GFP is diffuse in mCherry-BICD2-N expressing cell but is present at the EB1-positive MT plus ends in surrounding cells.

(B) HeLa cells were transfected with GFP-BICD2-N and stained for endogenous p150<sup>Glued</sup> (green) and EB3 (red). EB3 is an EB1 family member, which similar to EB1 marks growing MT plus ends. Insets show enlargements of the boxed areas. p150<sup>Glued</sup> is still detectable at the EB3-positive MT tips in the GFP-BICD2-N-expressing cell.

## Splinter et al., Suppl. Figure S4

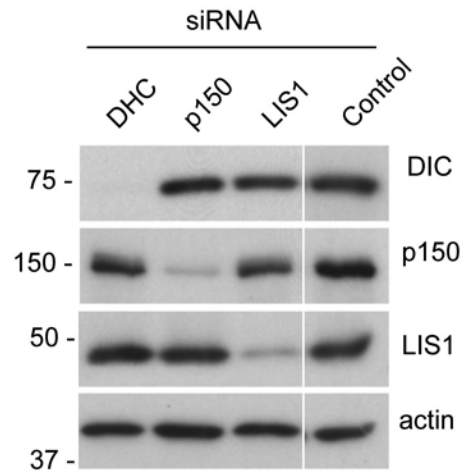

**Supplemental Figure S4. Characterization of DHC, p150<sup>Glued</sup> and LIS1 siRNAs.** HeLa cells were transfected with the indicated siRNAs and Western blots were performed with the indicated antibodies 3 days after transfection.

## Splinter et al., Suppl. Figure S5

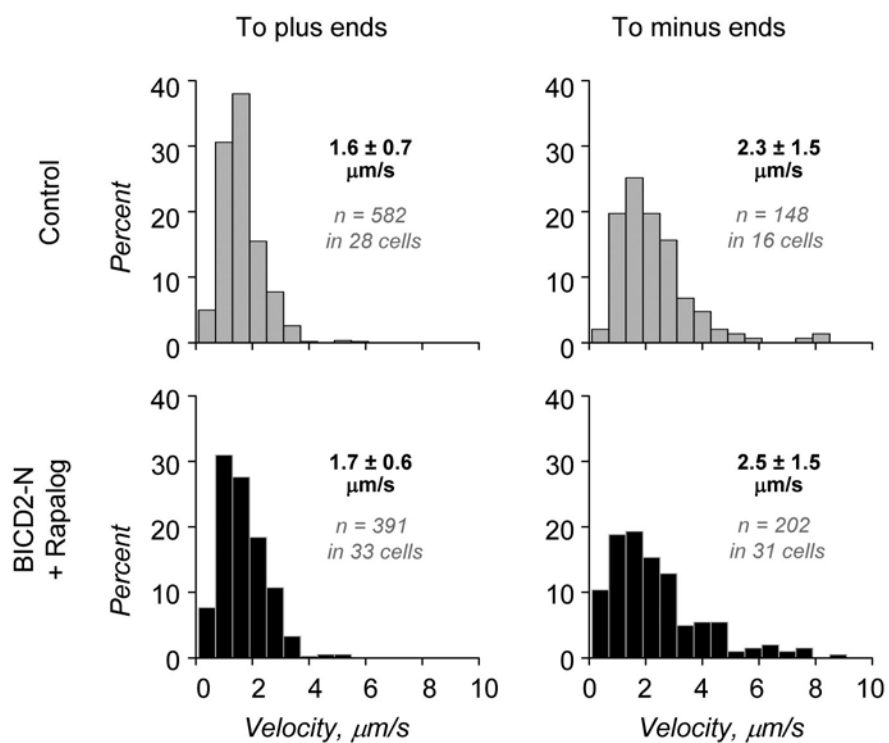

### Supplemental Figure S5. Rab6A vesicle movement velocities in the absence of BICD2-N and after BICD2-N recruitment.

Distributions of movement velocities to MT plus and minus ends in MRC5-SV cells expressing FKBP2-GFP-Rab6A alone or together with HA-BICD2-N-FRB, after rapalog addition.
